# Supplementary material for: Space-time variability of soil moisture droughts in the Himalayan region
Source: Copernicus journal article supplement (doi:10.5194/hess-2020-337), 2020-08-26
Supplement: Supplementary file 1 [file hess-2020-337-supplement.pdf]

## Supplementary Tables and Figures

### Supplementary Table 1: List and sources for the spatial and climatic datasets used in the J2000 Model for the Koshi River Basin

| SN | Data                                   | Data Sources        |
|----|----------------------------------------|---------------------|
| 1  | Digital Elevation Model (DEM)          | ASTER GDEM          |
| 2  | Land use map                           | Uddin et al. (2016) |
| 3  | Soil map                               | SOTER               |
| 4  | Geology map                            | DMG (1994)          |
| 5  | Meteorological data (stations numbers) |                     |
|    | i. Precipitation (160)                 | DHM, IMD, APHRODITE |
|    | ii. Temperature (60)                   | DHM, IMD, CFSR      |
|    | iii. Relative humidity (73)            | DHM, IMD, CFSR      |
|    | iv. Wind (66)                          | DHM, IMD, CFSR      |
|    | v. Sunshine hours (4)                  | DHM                 |

#### Notes:

- 1: ASTER GDEM: Advanced Spaceborne Thermal Emission and Reflection Radiometer. <https://asterweb.jpl.nasa.gov/gdem.asp>
- 2: Uddin et al. (2016) <http://rds.icimod.org/Home/DataDetail?metadataId=9224>
- 3: SOTER: Soil and Terrain Databases, Food and Agriculture Organization of the United Nations (FAO). <http://www.fao.org/soils-portal/soil-survey/soil-maps-and-databases/regional-and-national-soil-maps-and-databases/en/>
- 4: DMG, Department of Mines and Geology, Nepal (based on a physiographic division of Nepal)
- 5: DHM: Department of Hydrology and Meteorology, Nepal.
- 6: IMD: Indian Meteorological Department, India.
- 7: APHRODITE: Asian Precipitation – Highly-Resolved Observational Data Integration Towards Evaluation of Water Resources. (V1101) <http://www.chikyu.ac.jp/precip/english/>
- 8: CFSR: Climate Forecast System Reanalysis <https://climatedataguide.ucar.edu/climate-data/climate-forecast-system-reanalysis-cfsr>

**Supplementary Table 2: Monthly climatology for precipitation and temperature in three regions of the Koshi River basin, 1980–2007**

| Month  | Precipitation [mm] |           |        | Temperature [°C] |           |        |
|--------|--------------------|-----------|--------|------------------|-----------|--------|
|        | Trans-Himalaya     | Mountains | Plains | Trans-Himalaya   | Mountains | Plains |
| Jan    | 9.7                | 18.9      | 12.8   | -13.2            | 6.8       | 16.1   |
| Feb    | 15                 | 28.4      | 13.3   | -12.6            | 8.6       | 19.2   |
| Mar    | 20.3               | 43.7      | 13.8   | -8.8             | 12.5      | 23.9   |
| Apr    | 24.3               | 92.1      | 41.9   | -4.7             | 16        | 28.4   |
| May    | 36.5               | 185.7     | 112.3  | 0.2              | 18.1      | 30     |
| Jun    | 69.7               | 337.2     | 247.4  | 4.4              | 19.9      | 30.4   |
| Jul    | 137.8              | 540.6     | 481.3  | 7.1              | 20.2      | 29.4   |
| Aug    | 147.2              | 462       | 358.8  | 6.7              | 20.2      | 29.5   |
| Sep    | 78.8               | 314.7     | 259.6  | 4.2              | 19.1      | 28.8   |
| Oct    | 22.9               | 84.6      | 75.7   | -1.3             | 16.1      | 26.9   |
| Nov    | 5.8                | 14.2      | 5.4    | -7.7             | 11.9      | 22.7   |
| Dec    | 7.1                | 16.4      | 9.7    | -11.1            | 8.5       | 18.2   |
| Annual | 575                | 2139      | 1632   | -3.1             | 14.8      | 25.3   |

**Supplementary Table 3: Calibration parameters in the J2000 hydrological model**

| Parameter                         | Description                                         | Calibrated value | Normal range | Units |
|-----------------------------------|-----------------------------------------------------|------------------|--------------|-------|
| <i>Precipitation distribution</i> |                                                     |                  |              |       |
| Trs                               | Base temperature                                    | 0                | -1 to +1     | °C    |
| Trans                             | Parameter range for mixed rain and snow             | 2                | -2 to +2     | °C    |
| <i>Interception module</i>        |                                                     |                  |              |       |
| a_rain                            | Interception storage for rain                       | 1                | 0-5          | mm    |
| a_snow                            | Interception storage for snow                       | 1.28             | 0-5          | mm    |
| <i>Snow module</i>                |                                                     |                  |              |       |
| CritDens                          | Critical density of snow                            | 0.381            | 0-1          | %     |
| ColdContent                       | Cold content of snowpack                            | 0.0012           | 0-1          | NA    |
| BaseTemp                          | Threshold temperature for snowmelt                  | 0                | -5 to +5     | °C    |
| Tfactor                           | Melt factor by sensible heat                        | 2.84             | 0-5          | NA    |
| Rfactor                           | Melt factor by liquid precipitation                 | 0.21             | 0-5          | NA    |
| Gfactor                           | Melt factor by soil heat flow                       | 3.73             | 0-5          | NA    |
| <i>Glacier module</i>             |                                                     |                  |              |       |
| meltFactorIce                     | Melt factor for ice melt                            | 0.5              | 0-5          | NA    |
| alphaIce                          | Radiation melt factor for ice                       | 0.1              | 0-5          | NA    |
| kIce                              | Routing coefficient for ice melt                    | 15               | 0-50         | NA    |
| kSnow                             | Routing coefficient for snowmelt                    | 10               | 0-50         | NA    |
| kRain                             | Routing coefficient for rainfall-run-off            | 5                | 0-50         | NA    |
| debrisFactor                      | Debris factor for ice melt                          | 5                | 0-10         | NA    |
| glacierTbase                      | Threshold temperature for snowmelt                  | -1               | -5 to +5     | °C    |
| <i>Soil module</i>                |                                                     |                  |              |       |
| soilMaxDPS                        | Maximum depression storage                          | 2                | 0-10         | mm    |
| soilLinRed                        | Linear reduction coefficient for actual evaporation | 0.6              | 0-1          |       |
| soilMaxInfSummer                  | Maximum infiltration in summer                      | 45               | 0-200        | mm    |
| soilMaxInfWinter                  | Maximum infiltration in winter                      | 50               | 0-200        | mm    |
| soilMaxInfSnow                    | Maximum infiltration in snow-covered areas          | 40               | 0-200        | mm    |
| soilInpLT80                       | Infiltration for areas less than 80% sealing        | 0.5              | 0-1          | NA    |
| SoilDistMPSLPS                    | MPS-LPS distribution coefficient                    | 0.27             | 0-10         | NA    |
| SoilDiffMPSLPS                    | MPS-LPS diffusion coefficient                       | 0.1              | 0-10         | NA    |
| soilOutLPS                        | Outflow coefficient for LPS                         | 7                | 0-10         | NA    |
| soilLatVertLPS                    | Lateral vertical distribution coefficient           | 0.05             | 0-10         | NA    |
| soilMaxPerc                       | Maximum percolation rate to groundwater             | 30               | 0-100        | mm    |
| soilConcRD1Flood                  | Recession coefficient for flood event               | 1.1              | 1-10         | NA    |
| soilConcRD1Flood threshold        | Threshold value for soilConcRD1Flood                | 500              | 0-500        | NA    |

|                           |                                         |      |       |    |
|---------------------------|-----------------------------------------|------|-------|----|
| soilConcRD1               | Recession coefficient for overland flow | 1.5  | 1–10  | NA |
| SoilConcRD2               | Recession coefficient for interflow     | 1.8  | 1–10  | NA |
| <i>Groundwater module</i> |                                         |      |       |    |
| gwRG1RG2dist              | RG1–RG2 distribution coefficient        | 20   | 0–5   | NA |
| gwRG1Fact                 | Adaptation factor for RG1 flow          | 0.05 | 0–10  | NA |
| gwRG2Fact                 | Adaptation factor for RG2 flow          | 0.18 | 0–10  | NA |
| gwCapRise                 | Capillary rise coefficient              | 0.01 | 0–10  | NA |
| <i>Reach routing</i>      |                                         |      |       |    |
| flowRouteTA               | Flood routing coefficient               | 30   | 0–100 | NA |

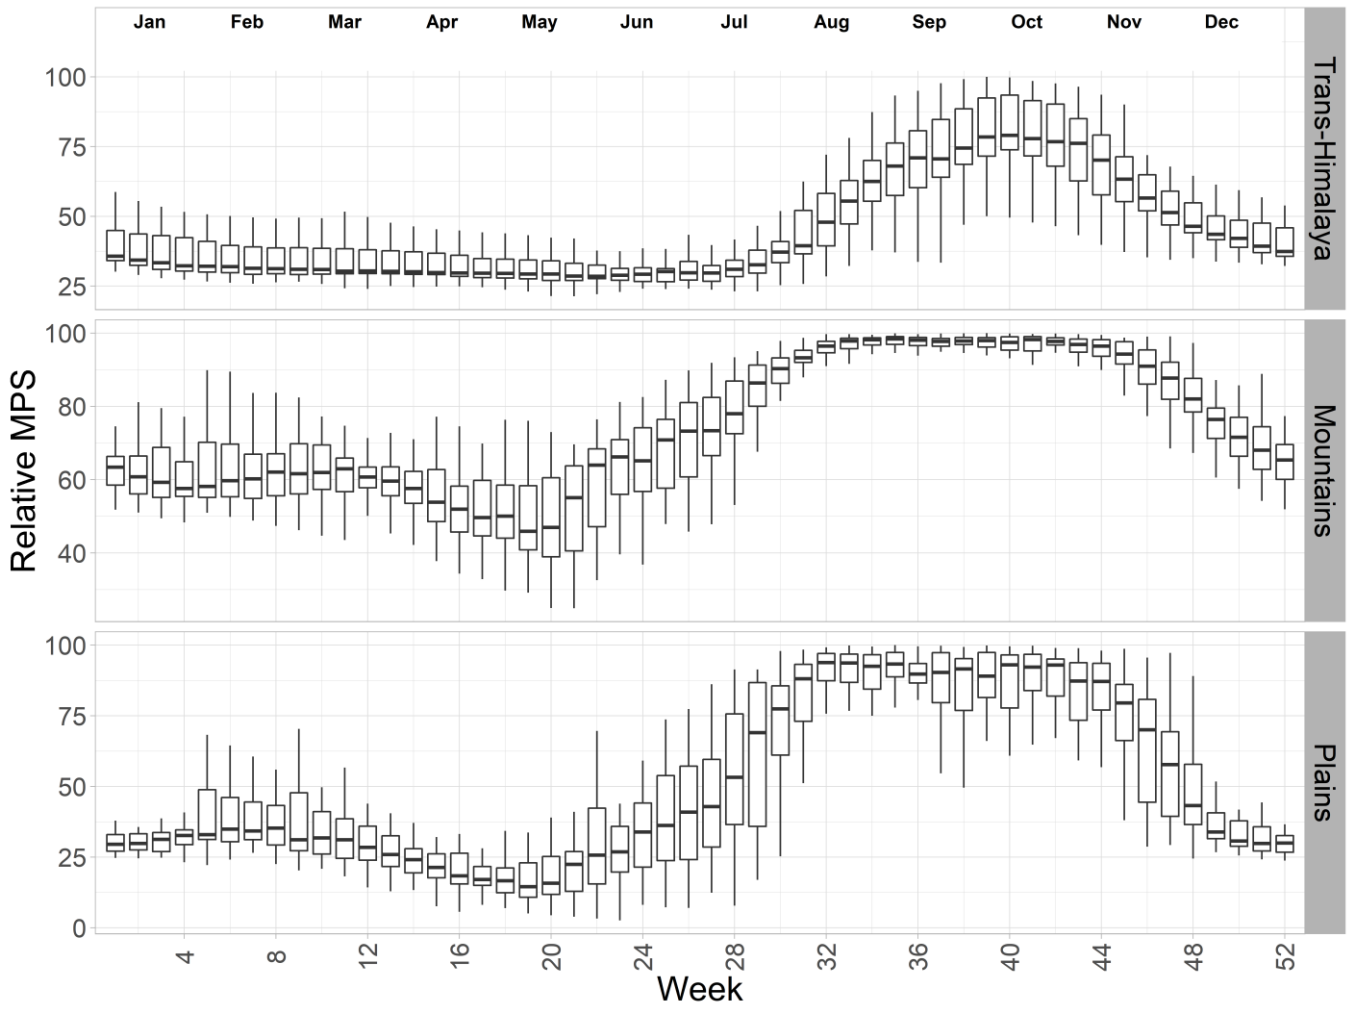

15

**Supplementary Figure 1: Variation in weekly soil moisture for the Koshi River basin, 1980–2007**

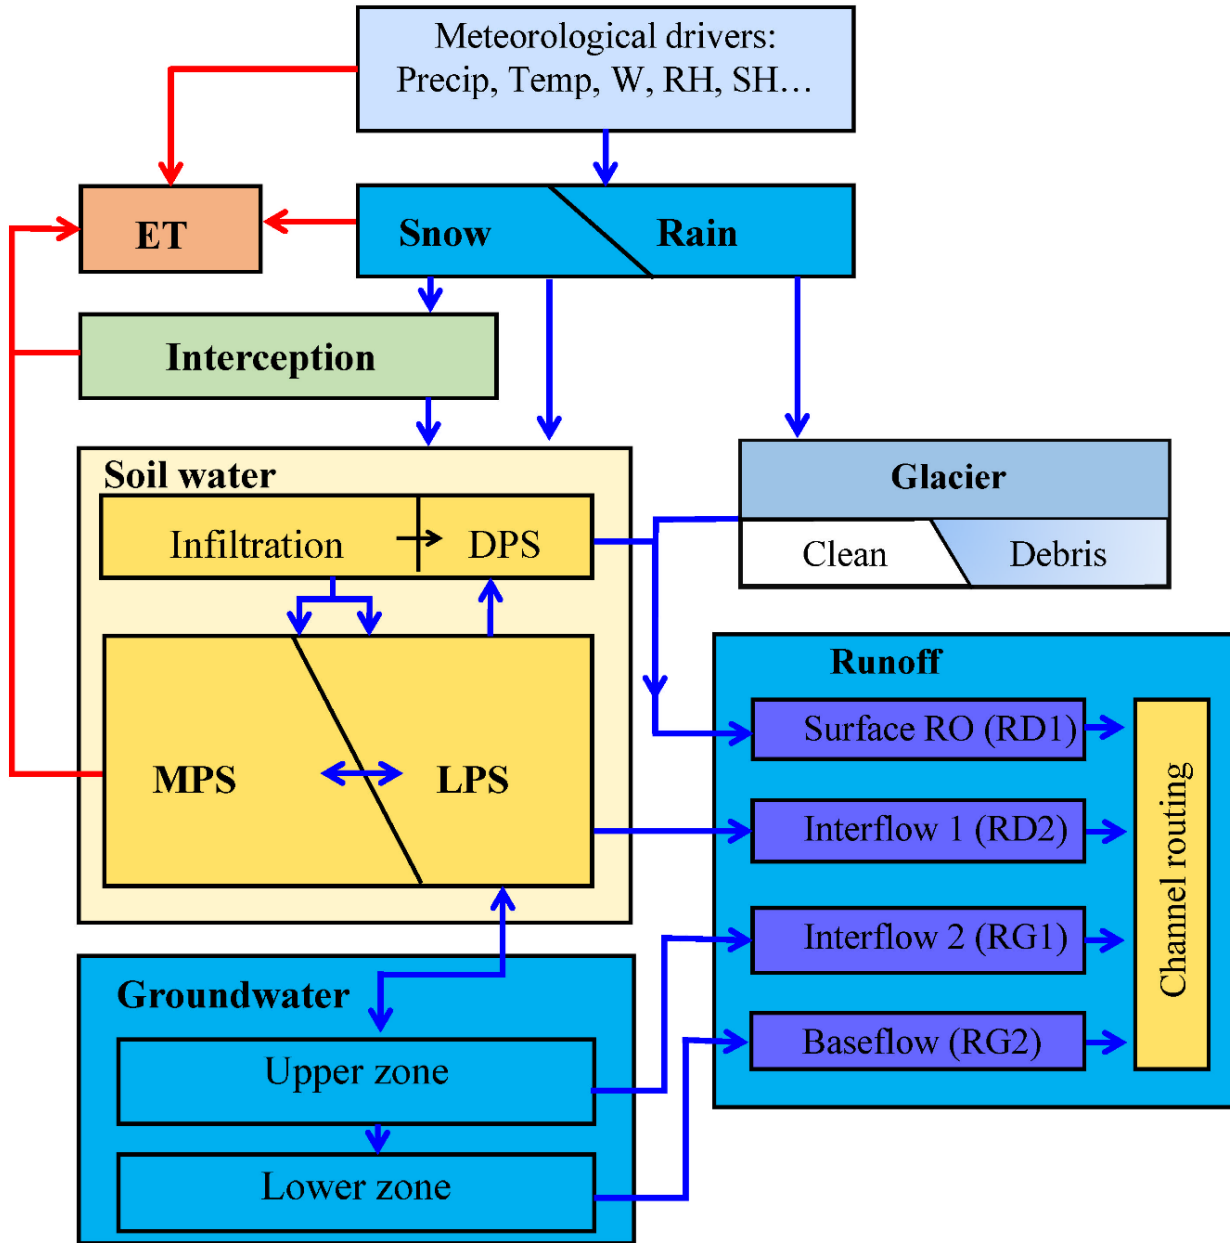

20

**Supplementary Figure 2: Conceptual layout of the J2000 hydrological model**  
**Sources: Adapted from Krause (2002), Krause et al. (2009) and Nepal et al. (2014)**

Notes: ET = evapotranspiration, Precip = precipitation, Temp = air temperature, W = wind speed, RH = relative humidity, SH = sunshine hours, LPS = large pore storage, MPS = middle pore storage, DPS = depression storage, RO = runoff

25
